# Supplementary material for: The σ1 Receptor Engages the Redox-Regulated HINT1 Protein to Bring Opioid Analgesia Under NMDA Receptor Negative Control
Source: PubMed Central journal article supplement — Antioxid Redox Signal. 2015 Apr 1;22(10):799–818. doi: 10.1089/ars.2014.5993 (PMC4367239; doi:10.1089/ars.2014.5993), 2015-04-01
Supplement: Supp_Fig1.pdf [file Supp_Fig1.pdf]

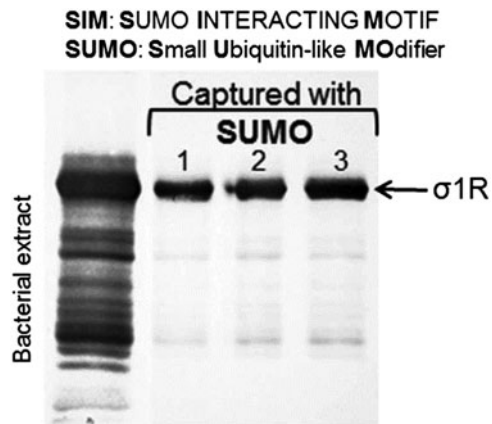

**SUPPLEMENTARY FIG. S1. The  $\sigma$ 1R SUMO interacting motif.** The  $\sigma$ 1R loop region contains a SIM (LIVEL, 61-65) (9, 10). Both forms of the  $\sigma$ 1R could be purified from the bacterial extract with agarose-SUMO 1, 2, or 3. The image corresponds to the GST- $\sigma$ 1R, and total protein was revealed by fluorescence (SYPRO Ruby; Invitrogen, Madrid, Spain) and captured in an Alpha-Innotech (ChemImager 5500; Santa Clara, CA).
