# Supplementary material for: The σ1 Receptor Engages the Redox-Regulated HINT1 Protein to Bring Opioid Analgesia Under NMDA Receptor Negative Control
Source: PubMed Central journal article supplement — Antioxid Redox Signal. 2015 Apr 1;22(10):799–818. doi: 10.1089/ars.2014.5993 (PMC4367239; doi:10.1089/ars.2014.5993), 2015-04-01
Supplement: Supp_Fig2.pdf [file Supp_Fig2.pdf]

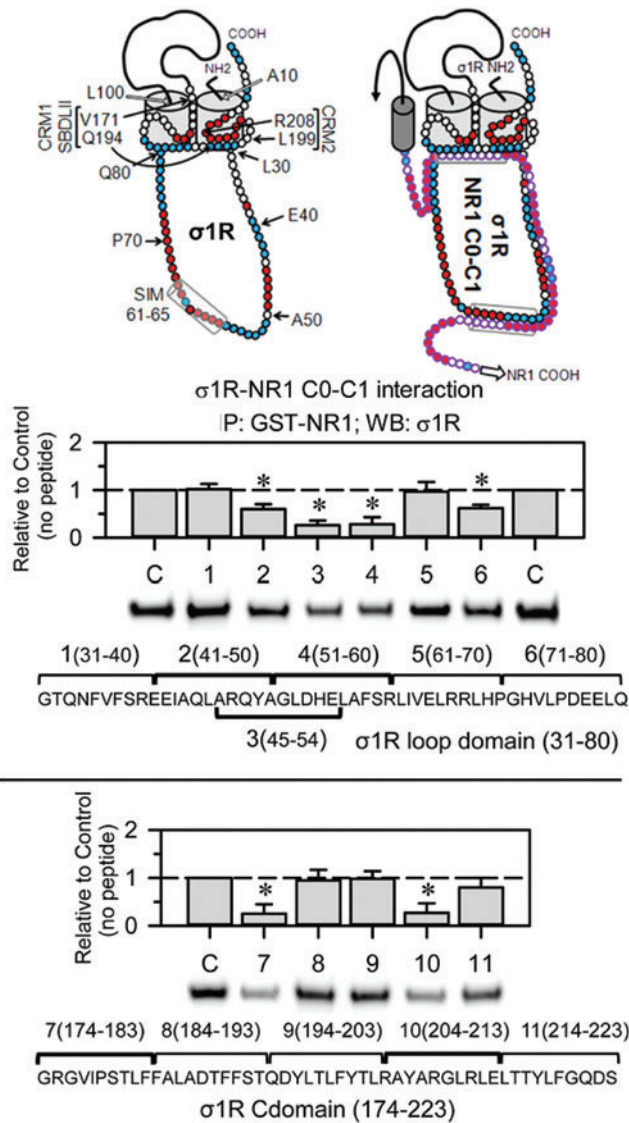

**SUPPLEMENTARY FIG. S2. Interference assay of the association between the  $\sigma$ 1R loop region and the cytosolic region of NMDAR NR1 subunits.** A series of overlapping peptides ( $30 \mu\text{M}$ ) mapping the loop region of  $\sigma$ 1R were incubated with  $100 \text{ nM}$  NR1 C0-C1-C2 subunits before the addition of  $100 \text{ nM}$   $\sigma$ 1R. GST-NR1 was precipitated, and the associated protein was evaluated through ECL-densitometry (ChemImager 5500-AlphaEase; Alpha-Innotech). These data were obtained from three independent assays. \*Significantly different from the  $\sigma$ 1R signals observed in the absence of interfering peptides, ANOVA-Student-Keuls test;  $p < 0.05$ . Amino acid charge, see key in Fig. 3C.
