# Supplementary material for: The σ1 Receptor Engages the Redox-Regulated HINT1 Protein to Bring Opioid Analgesia Under NMDA Receptor Negative Control
Source: PubMed Central journal article supplement — Antioxid Redox Signal. 2015 Apr 1;22(10):799–818. doi: 10.1089/ars.2014.5993 (PMC4367239; doi:10.1089/ars.2014.5993), 2015-04-01
Supplement: Supp_Fig3.pdf [file Supp_Fig3.pdf]

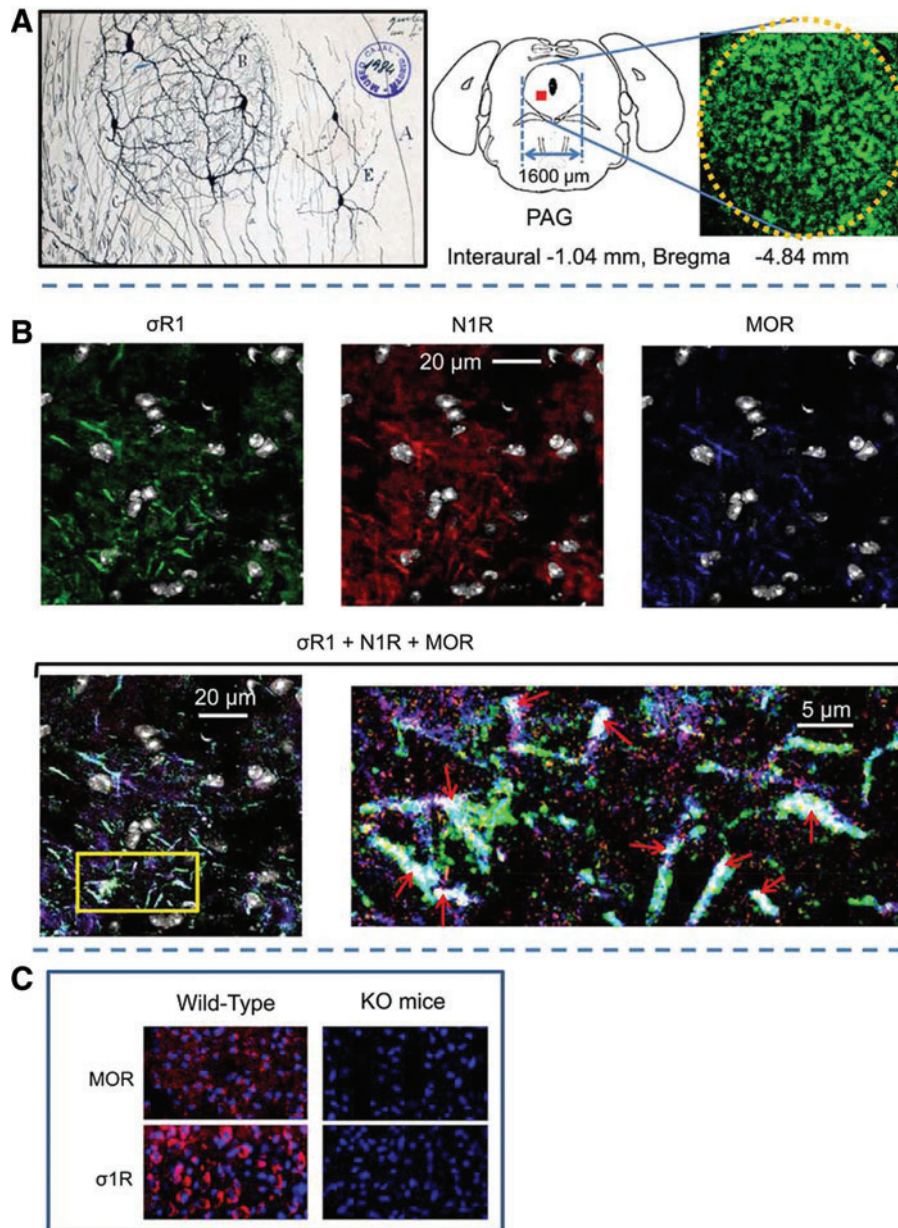

**SUPPLEMENTARY FIG. S3. Co-localization of the NMDAR NR1 subunit with  $\sigma\text{1R}$  and the MOR, and of  $\sigma\text{1R}$  with the MOR in mouse PAG neurons.** (A) *Left panel*, Original Cajal drawing showing a view of the ventro-lateral region of PAG, Golgi method. A: cerebral aqueduct; B and C axons in Darkschewitsch nucleus; E, fiber-rich region of the central gray matter. *Right panel*, Mouse PAG (yellow dotted circle) and Coronal drawing of mouse brain showing the PAG region analyzed in this triple co-localization of  $\sigma\text{1R}$ , NMDAR NR1 subunit, and MOR. (B) Confocal laser-scanning microphotographs taken from coronal sections of the mouse midbrain PAG. The individual labeling and triple co-localization of NMDAR NR1 subunit (red),  $\sigma\text{1R}$  (green) and MOR (blue) was studied in the dorsolateral region (red square in the PAG diagram). Nuclei are in gray (DAPI) and the MOR, NR1, and  $\sigma\text{1R}$  were observed with Alexa Fluor 647, 555 and 488, respectively. In this ventro-lateral PAG region, triple co-localization of the MOR,  $\sigma\text{1R}$ , and NR1 subunits is mostly observed in fibers, probably corresponding to synapses. Note that high-power magnification *panel* (nuclei were removed) shows triple co-localization as white regions (red arrows). Coincidence between NR1 and  $\sigma\text{1R}$  is shown in yellow color. The MOR co-localizes with  $\sigma\text{1R}$  (purple color) and NR1 (light green color). For details, see Materials and Methods section and Figure 4. A positive control sample labeled with conventional secondary detection methods was included in the pilot studies to confirm the specificity of the staining observed with Zenon labeling. A negative control was processed with the same protocol but with the omission of the primary antibody to assess nonspecific labeling. (C) Immunodetection of the MOR or of  $\sigma\text{1R}$  in the PAG of wild-type and knock-out mice (both antibodies in red and the nuclei in blue). Note the negative staining for either MOR or  $\sigma\text{1R}$  in the respective KO mice. MOR, mu-opioid receptor; PAG, periaqueductal gray matter.
