# Supplementary material for: The σ1 Receptor Engages the Redox-Regulated HINT1 Protein to Bring Opioid Analgesia Under NMDA Receptor Negative Control
Source: PubMed Central journal article supplement — Antioxid Redox Signal. 2015 Apr 1;22(10):799–818. doi: 10.1089/ars.2014.5993 (PMC4367239; doi:10.1089/ars.2014.5993), 2015-04-01
Supplement: Supp_Fig6.pdf [file Supp_Fig6.pdf]

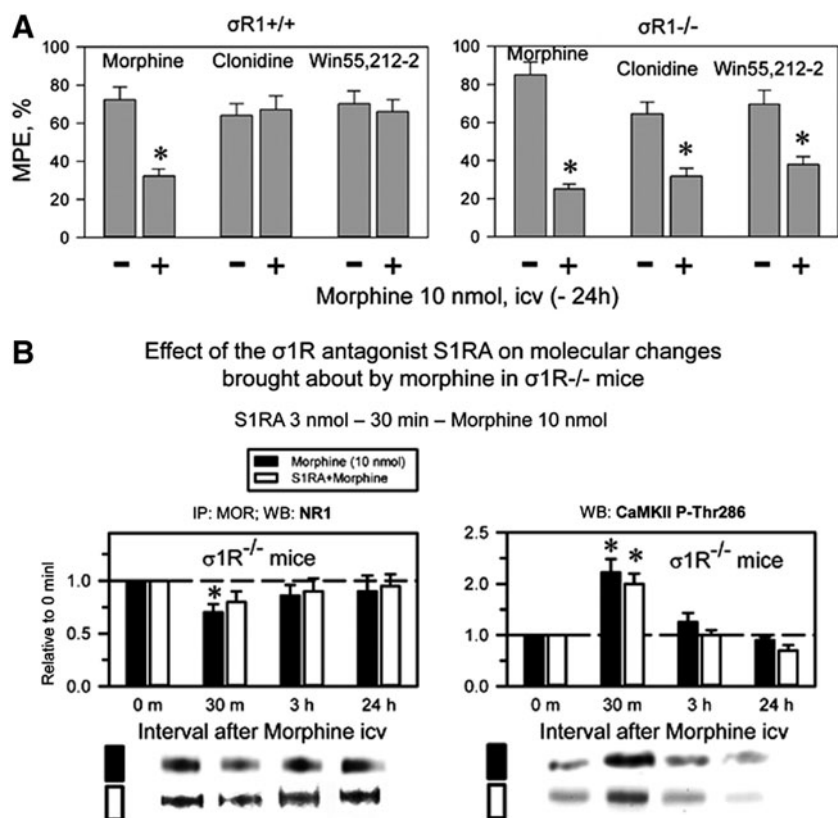

**SUPPLEMENTARY FIG. S6. The absence of  $\sigma R1$ s disconnects NMDAR negative influence from MOR signaling.** (A) Morphine produces heterologous tolerance in  $\sigma R1^{-/-}$  mice. Groups of four mice each were injected icv with 10 nmol morphine and the analgesic effect of morphine, 150 nmol clonidine, and 20 nmol WIN55,212-2 was assessed 24 h later (30 min after morphine and the agonist of  $\alpha 2$ -adrenoceptors clonidine, 10 min after the cannabinoid). \*Significantly different from the respective control group that received the priming dose of morphine, ANOVA, Student–Newman–Keuls test,  $p < 0.05$ . (B) Morphine promotes little activation of the NMDAR–CaMKII pathway in  $\sigma R1^{-/-}$  mice: effect of S1RA. Mice were icv-injected with 10 nmol morphine, and the *ex vivo* assays were performed at the postopioid time intervals indicated. The administration of S1RA to  $\sigma R1^{-/-}$  mice did not alter these molecular effects of morphine.
