# Supplementary material for: The σ1 Receptor Engages the Redox-Regulated HINT1 Protein to Bring Opioid Analgesia Under NMDA Receptor Negative Control
Source: PubMed Central journal article supplement — Antioxid Redox Signal. 2015 Apr 1;22(10):799–818. doi: 10.1089/ars.2014.5993 (PMC4367239; doi:10.1089/ars.2014.5993), 2015-04-01
Supplement: Supp_Fig7.pdf [file Supp_Fig7.pdf]

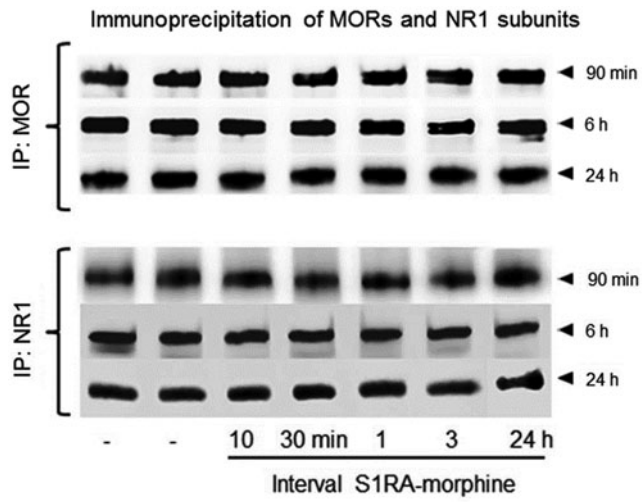

**SUPPLEMENTARY FIG. S7. Controls of MOR and NR1 immunoprecipitation**—see Figure 9. MORs and NR1 subunits were determined through Western blot analysis for control, morphine, and various S1RA-morphine-treated groups and sacrificed at 90 min, 6, and 24 h postmorphine.
