# Supplementary material for: The σ1 Receptor Engages the Redox-Regulated HINT1 Protein to Bring Opioid Analgesia Under NMDA Receptor Negative Control
Source: PubMed Central journal article supplement — Antioxid Redox Signal. 2015 Apr 1;22(10):799–818. doi: 10.1089/ars.2014.5993 (PMC4367239; doi:10.1089/ars.2014.5993), 2015-04-01
Supplement: Supp_Fig8.pdf [file Supp_Fig8.pdf]

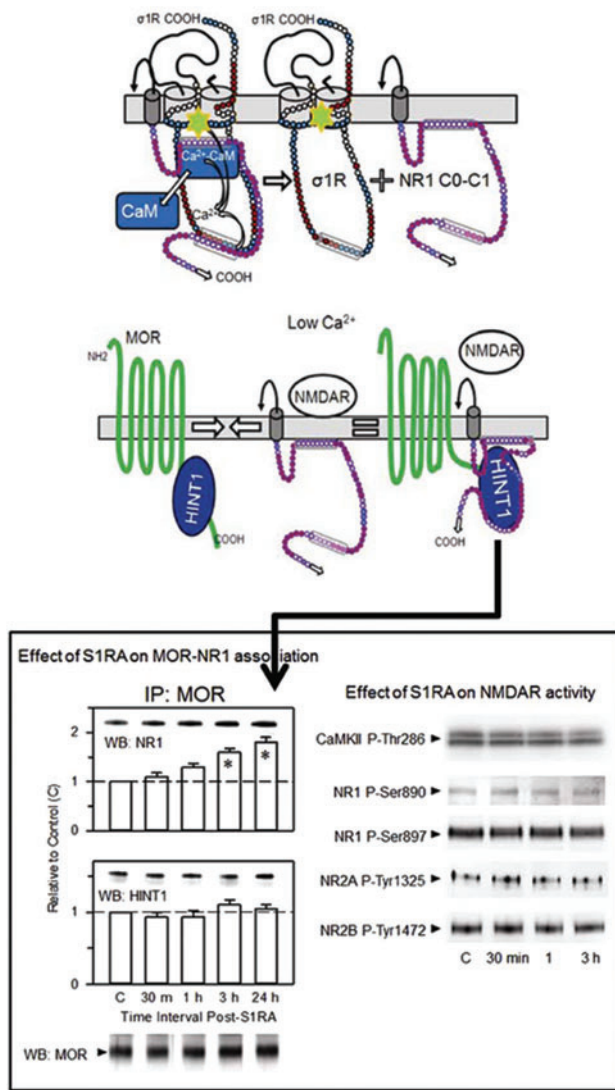

**SUPPLEMENTARY FIG. S8. Antagonists of  $\sigma$ 1Rs promote the uncoupling of MOR activity from the negative control of glutamate NMDARs.** Antagonists of  $\sigma$ 1Rs promote the uncoupling of MOR activity from the negative control of glutamate NMDARs. Antagonists of  $\sigma$ 1Rs such as S1RA facilitate NR1 C0 binding with Ca<sup>2+</sup>-CaM to inhibit NMDAR calcium fluxes, indicated by the framed NMDAR without *asterisks*. In the absence of MOR regulation of PLCs, Ca<sup>2+</sup>-CaM binding further reduces calcium levels in the NMDAR environment, promoting the subsequent release of calcium-depleted CaM from NR1 subunits. In these circumstances, MOR-HINT1 binds with high affinity to NR1 subunits being observed as a time-dependent increase in MOR-NR1 association. In PAG synaptosomes derived from mice treated with only S1RA, the  $\sigma$ 1R antagonist produced no other noticeable changes in the other molecular parameters evaluated. Amino acid charge, see key in Fig. 3C.
